# Supplementary material for: Differential Proteomics of Helicobacter pylori Isolates from Gastritis, Ulcer, and Cancer Patients: First Study from Northwest Pakistan
Source: MDPI journal article supplement (doi:10.3390/medicina58091168), 2022-08-28
Supplement: s1 [file s1]

**Supplementary Table S1:** Proteins identified through Q-TOF mass spectrometry in *H. pylori* isolates

| S. No | Protein Name                                      | Gene     |
|-------|---------------------------------------------------|----------|
| 1     | Uncharacterized protein                           | OUQ_0997 |
| 2     | Nucleoside diphosphate kinase                     | ndk      |
| 3     | Thioredoxin peroxidase                            | bcp      |
| 4     | Ribosome maturation factor RimM                   | rimM     |
| 5     | DUF3972 domain-containing protein                 | OUQ_0609 |
| 6     | Putative TRANSCRIPTIONAL REGULATOR                | OUQ_0342 |
| 7     | HNH endonuclease family protein                   | OUQ_1426 |
| 8     | ThiS family protein                               | OUQ_1033 |
| 9     | Flagellar FliJ protein                            | OUQ_0438 |
| 10    | Putative pZ21b                                    | OUQ_1226 |
| 11    | Hydrogenase maturation factor HypA                | hypA     |
| 12    | Uncharacterized protein                           | OUQ_1153 |
| 13    | Type I restriction-modification system_ M subunit | hsdM     |
| 14    | Sec-independent protein translocase protein TatB  | tatB     |
| 15    | Uncharacterized protein                           | OUQ_1102 |
| 16    | DUF3944 domain-containing protein                 | OUQ_0172 |
| 17    | Putative 3'-5' exonuclease                        | OUQ_0544 |
| 18    | Glycosyl transferase 11 family protein            | OUQ_0267 |
| 19    | D_D-heptose 1_7-bisphosphate phosphatase          | gmhB     |
| 20    | ddrB-ParB domain-containing protein (Fragment)    | OUQ_1280 |
| 21    | Pseudaminic acid synthase                         | pseI     |
| 22    | AAA ATPase domain protein                         | OUQ_0379 |
